# Supplementary material
Source: publisher figshare collection journal article supplement (https://aacr.figshare.com/articles/dataset/_/23627203)
Supplement: Supplementary file 1 [file 41457922]

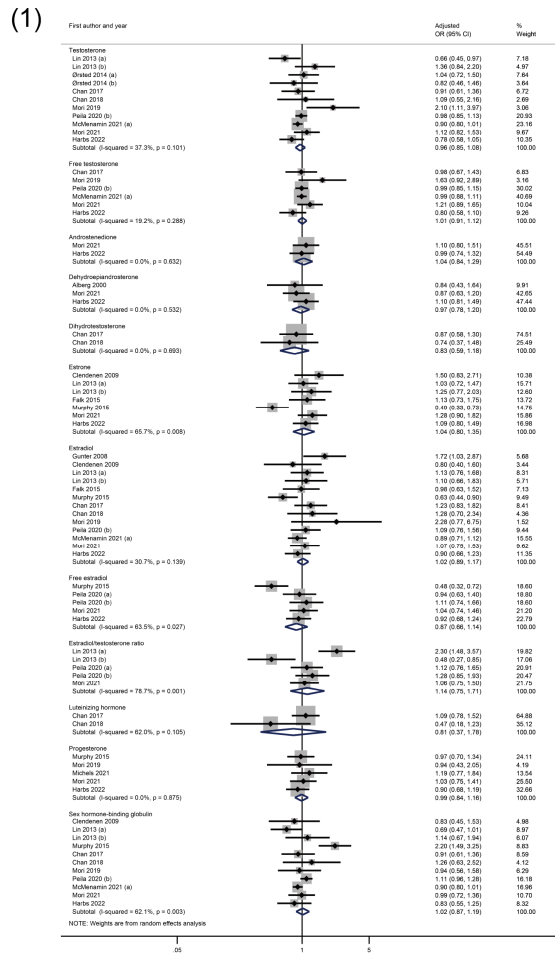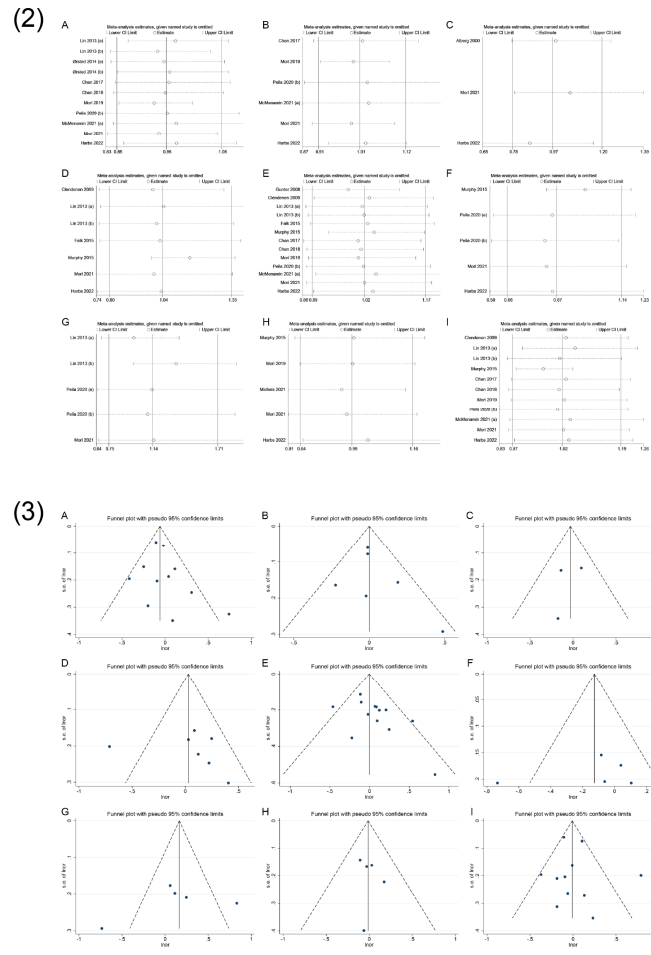

**Supplementary Figure S5. Forest plots (1), sensitivity analysis (2) and funnel plots (3) of the associations between prediagnostic circulating sex hormone levels and colorectal cancer risk. (a) male; (b) female. (A) testosterone; (B) free testosterone; (C) dehydroepiandrosterone; (D) estrone; (E) estradiol; (F) free estradiol; (G) estradiol/testosterone ratio; (H) progesterone; (I) sex hormone-binding globulin.**
